# Supplementary material for: Surfactant-assisted solvothermal synthesis of NiCo2O4 as an anode for lithium-ion batteries
Source: Royal Society of Chemistry journal article supplement (doi:10.1039/c7ra06172b), 2017-01-01
Supplement: c7ra06172b1.pdf [file c7ra06172b1.pdf]

## Supporting Information

# Surfactant-Assisted Solvothermal Synthesis of $\text{NiCo}_2\text{O}_4$ as Anodes for Lithium-ion Batteries

Yehua Li <sup>a, b</sup>, Xianwen Wu <sup>a, b\*</sup>, Suliang Wang <sup>a, b</sup>, Wenqi Wang <sup>a, b</sup>, Yanhong Xiang <sup>a</sup>, Chunhui Dai <sup>a, b</sup>, Zhixiong Liu <sup>a</sup>, Zeqiang He <sup>a</sup>, Xianming Wu <sup>a</sup>

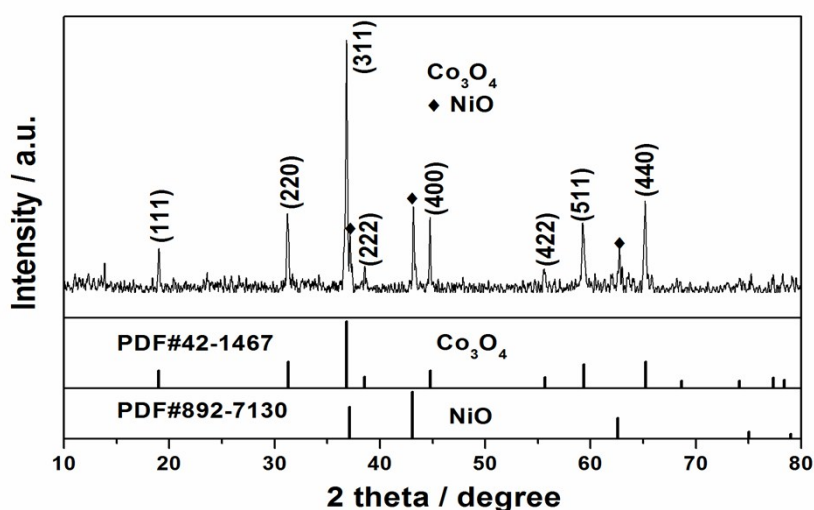

Figure SI-1 The XRD of  $\text{NiCo}_2\text{O}_4$  by calcining the precursors at 600 °C

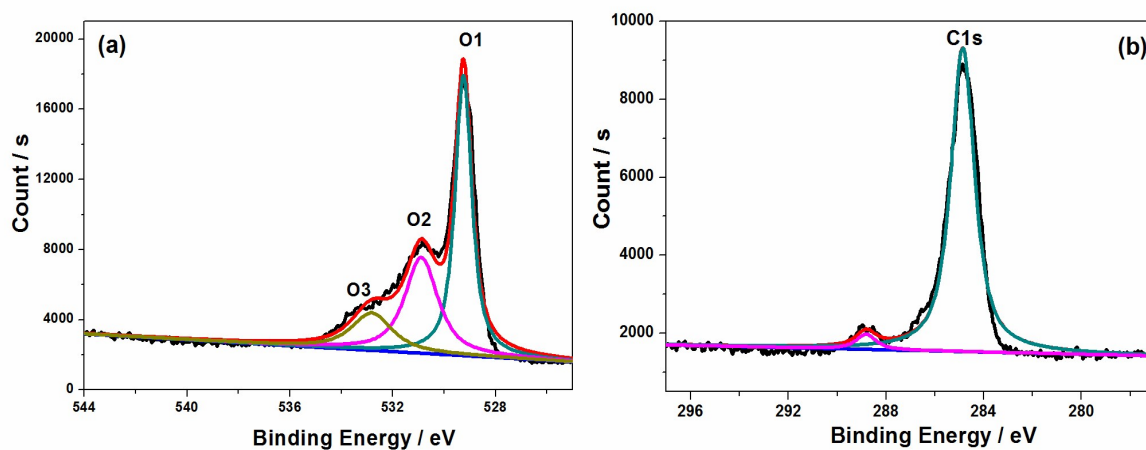

Figure SI-2 The XPS of  $\text{NiCo}_2\text{O}_4$  (a)  $\text{O}1s$  spectrum and (b)  $\text{C}1s$  spectrum

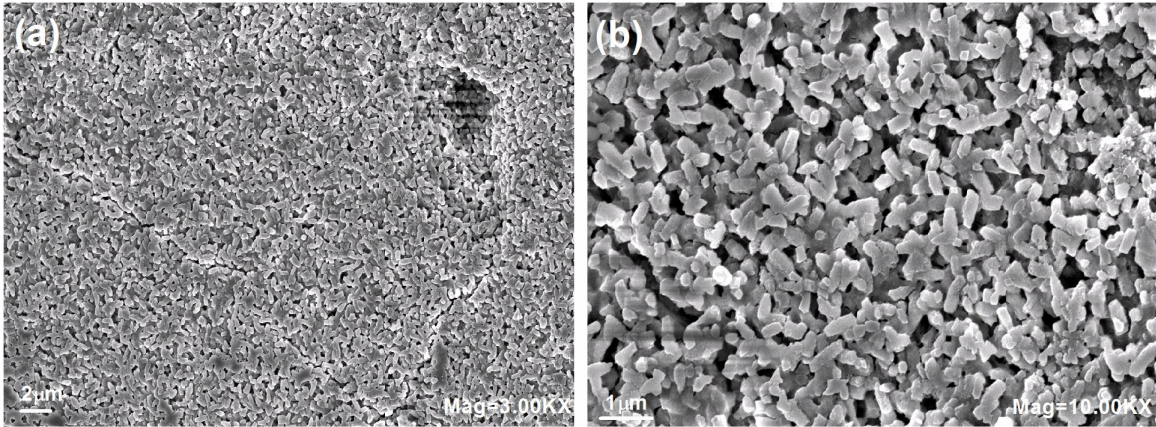

Figure SI-3 SEM of NiCo<sub>2</sub>O<sub>4</sub> electrode after cycling at different magnification

Table SI-1 Comparison of electrochemical properties of different cathode materials for NiCo<sub>2</sub>O<sub>4</sub>

| Materials                                           | Synthesis method        | Initial capacity (mAh/g)/coulombic efficiency (%) | Capacity retention                   | Reference |
|-----------------------------------------------------|-------------------------|---------------------------------------------------|--------------------------------------|-----------|
| NiCo <sub>2</sub> O <sub>4</sub> nanorods           | Co-precipitation method | 1400/60.14                                        | 400mAh/g after 25 cycles (100mA/g)   | [1]       |
| NiCo <sub>2</sub> O <sub>4</sub> nanosheets         | Microwave method        | 1520/52.5                                         | 767 mAh/g after 50 cycles (100mA/g)  | [2]       |
| NiCo <sub>2</sub> O <sub>4</sub> microflowers       | Solvothermal method     | 1770/71.58                                        | 952 mAh/g after 50 cycles (100mA/g)  | [3]       |
| NiCo <sub>2</sub> O <sub>4</sub> nanorods           | Co-precipitation method | 1364/75.15                                        | 650 mAh/g after 150 cycles (100mA/g) | [4]       |
| NiCo <sub>2</sub> O <sub>4</sub> /carbon nanoflakes | Hydrothermal method     | 798.5/82.1                                        | 555.8 mAh/g after 30 cycles (40mA/g) | [5]       |
| NiCo <sub>2</sub> O <sub>4</sub> nanoplates         | Co-precipitation method | 1265/72.56                                        | 836 mAh/g after 50 cycles (60mA/g)   | [6]       |
| NiCo <sub>2</sub> O <sub>4</sub> microsphere        | Solvothermal method     | 1160/79.36                                        | 729 mAh/g after 50 cycles (100mA/g)  | [7]       |

|                                                |                                       |            |                                      |           |
|------------------------------------------------|---------------------------------------|------------|--------------------------------------|-----------|
| NiCo <sub>2</sub> O <sub>4</sub> microsphere   | Solvothermal method                   | 1712/70.91 | 1198mAh/g after 30 cycles (200mA/g)  | [8]       |
| NiCo <sub>2</sub> O <sub>4</sub> nanoparticles | microemulsion and hydrothermal method | 1176/75.41 | 1175 mAh/g after 45 cycles (100mA/g) | This work |

- [1] S. Divya, R. Pongilat, T. Kuila, K. Nallathamby, S. K. Srivastava, P. Roy, *J. Nanosci. Nanotechnol.*, 2016, 16: 9761-9770.
- [2] A. K. Mondal, D. Su, S. Chen, K. Kretschmer, X. Xie, H. J. Ahn, G. Wang, *Chem. Phys. Chem.*, 2015, 16:169-175.
- [3] J. Xu, L. He, W. Xu, H. Tang, H., Liu, T., Hao, C. Zhang, Y., Zhang, *Electrochim. Acta*, 2014, 145: 185-192.
- [4] Z. Ju, G. Ma, Y. Zhao, Z. Xing, Y. Qiang, Y. Qian, *Part. Part. Syst. Charact.*, 2016, 32:1012-1019.
- [5] Y. NuLi, P. Zhang, Z. Guo, H. Liu, J. Yang, J. Wang, *Mater. Res. Bull.*, 2009, 44: 140-145.
- [6] S. Chaudhari, D. Bhattacharjya, J. Yu, *Bull. Kor. Chem. Soc.*, 2015, 36:2330-2336.
- [7] S. Xu, L. Lu, Q. Zhang, H. Zheng, L. Liu, S. Yin, S. Wang, G. Li, C. Feng, *Nanopart. Res.*, 2015, 17:381-341.
- [8] J. Li, S. Xiong, Y. Liu, Z. Ju, Y. Qian, *ACS Appl. Mater. Interfaces*, 2013, 5: 981-988.
